# Supplementary material for: Prevalence and Genetic Diversity of Staphylococcal Enterotoxin (-Like) Genes sey, selw, selx, selz, sel26 and sel27 in Community-Acquired Methicillin-Resistant Staphylococcus aureus
Source: PubMed Central journal article supplement (PMC7291287; doi:10.3390/toxins12050347), 2020-05-23
Supplement: toxins-12-00347-s001.pdf [file toxins-12-00347-s001.pdf]

# Supplementary Materials: Prevalence and Genetic Diversity of Staphylococcal Enterotoxin (-like) Genes *sey*, *selw*, *selx*, *selz*, *sel26* and *sel27* in Community-Acquired Methicillin-Resistant *Staphylococcus aureus*

Meiji Soe Aung, Noriko Urushibara, Mitsuyo Kawaguchiya, Masahiko Ito, Satoshi Habadera and Nobumichi Kobayashi

(a)

|                      |                                                               |     |
|----------------------|---------------------------------------------------------------|-----|
| JP087- <i>sey</i> 1  | MKAKLCFLLTTLAFLI AVTGSIGIAEVKAKTTGLITENSNDSLKEHYAQKFEVYTNKEVT | 60  |
| SC1133- <i>sey</i> 4 | MKAKLCFLLTTLAFLI AVTGSIGIAEVKAKTTGLITENSNDSLKEHYAQKFEVYTNKEVT | 60  |
| JP096- <i>sey</i> 3  | MKAKLWFLLTTLAFLI AVTGSIGIAEVKAKTTGLITENSNDSLKEHYAQKFEVYTNKEIT | 60  |
| SC570- <i>sey</i> 5  | MKAKLWFLLTTLAFLI AVTGSIGIAEVKAKTTGLITENSNDSLKEHYAQKFEVYTNKEVT | 60  |
| RF122- <i>sey</i> 7  | MKAKLWFLLTTLAFLI AVTESIGIAEVKAKTTGLITENSNDSLKEHYAQKFEVYTNKEVT | 60  |
| JP074- <i>sey</i> 2  | MKAKLWFLLTTLAFLI AVTGSIGIAEVKAKTTGLITENSNDSLKEHYAQKFEVYTNKEVT | 60  |
| RK14- <i>sey</i> 6   | MKAKLWFLLTTLAFLI AVTGSIGIAEVKAKTTGLITENSNDSLKEHYAQKFEVYTNKEVT | 60  |
|                      | *****                                                         |     |
| JP087- <i>sey</i> 1  | GVGENYIDAKVDTYNVRTVLYNTDYLKQFKNQDKVNIWGTLYENQQSKVYRGTVVKYDPI  | 120 |
| SC1133- <i>sey</i> 4 | GVGENYIDAKVDTYNVRTVLYNTDYLKQFKNQDKVNIWGTLYENQQSKVYRGTVVKYDPI  | 120 |
| JP096- <i>sey</i> 3  | GVGENYIDAKVDTYNVRTVLYNTDYLKQFKNQDKVNIWGTLYENKQSKVYRGTVVKYDPI  | 120 |
| SC570- <i>sey</i> 5  | GVGENYIDAKVDTYNVRTVLYNTDYLKQFKNQDKVNIWGTLYENKQSKVYRGTVVKYDPI  | 120 |
| RF122- <i>sey</i> 7  | GVGENYIDTKVDTYNVRTVLYNTDYLKQFKNQDKVNIWGTLYENQQSKVYRGTVVKYDPI  | 120 |
| JP074- <i>sey</i> 2  | GVGENYIDTKVDTYNVRTVLYNTDYLKQFKNQDKVNIWGTLYENQQSKVYRGTVVKYDPI  | 120 |
| RK14- <i>sey</i> 6   | GVGENYIDVKVDTYNVRTVLYNTDYLKQFKNQDKVNIWGTLYENQQSKVYRGTVVKYDPI  | 120 |
|                      | *****                                                         |     |
| JP087- <i>sey</i> 1  | SKVTNLSYRMNLFVNGHQTKVNPDSLLEVKNKQISLKETDFRIRKYLLEKEHLYSNYNSG  | 180 |
| SC1133- <i>sey</i> 4 | SKVTNLSYRMNLFVNGHQTKVNPDSLLEVKNKQISLKETDFRIRKYLLEKEHLYSNYNSG  | 180 |
| JP096- <i>sey</i> 3  | SKVTNLSYRMNLFVNGHQTKVNPDSLLEVKNKQISLKETDFRIRKYLLEKEHLYSNYNSG  | 180 |
| SC570- <i>sey</i> 5  | SKVTNLSYRMNLFVNGHQTKVNPDSLLEVKNKQISLKETDFRIRKYLLEKEHLYSNYNSG  | 180 |
| RF122- <i>sey</i> 7  | SKVTNLSYRMNLFVNGHQTKVNPDSLLEVKNKQISLKETDFRIRKYLLEKEHLYSNYNSG  | 180 |
| JP074- <i>sey</i> 2  | SKVTNLSYRMNLFVNGHQTKVNPDSLLEVKNKQISLKETDFRIRKYLLEKEHLYSNYNSG  | 180 |
| RK14- <i>sey</i> 6   | SKVTNLSYRMNLFVNGHQTKVNPDSLLEVKNKQISLKETDFRIRKYLLEKEHLYSNYNSG  | 180 |
|                      | *****                                                         |     |
| JP087- <i>sey</i> 1  | ELIEMKNGARHKIDLGDILSDSQEKTFFDNI SHIDIYMK                      | 221 |
| SC1133- <i>sey</i> 4 | ELIEMKNGARHKIDLGDILSDSQEKTFFDNI SHIDIYMK                      | 221 |
| JP096- <i>sey</i> 3  | ELIEMKNGARHKIDLGDILSDSQEKTFFDNI SHIDIYMK                      | 221 |
| SC570- <i>sey</i> 5  | ELIEMKNGARHKIDLGDILSDSQEKTFFDNI SHIDIYMK                      | 221 |
| RF122- <i>sey</i> 7  | ELIEMKNGARHKIDLGDILSDSQEKTFFDNI SHIDIYMK                      | 221 |
| JP074- <i>sey</i> 2  | ELIEMKNGARHKIDLGDILSDSQEKTFFDNI SHIDIYMK                      | 221 |
| RK14- <i>sey</i> 6   | ELIEMKNGARHKIDLGDILSDSQEKTFFDNI SHIDIYMK                      | 221 |
|                      | ***.*****                                                     |     |

(b)

|              |                                                                 |    |
|--------------|-----------------------------------------------------------------|----|
| <i>sey</i> 4 | ATGAAAGCGAAACTATGTTTTTTATTGACAACCTTTGGCATTGTTTATTGTCAGTAACGGGA  | 60 |
| <i>sey</i> 1 | ATGAAAGCGAAACTATGTTTTTTATTGACAACCTTTGGCATTGTTTATTGTCAGTAACGGGA  | 60 |
| <i>sey</i> 6 | ATGAAAGCTAAATTATGGTTTTTTATTGACAACCTTTGGCATTGTTTATTGTCAGTAACGGGA | 60 |
| <i>sey</i> 2 | ATGAAAGCGAAACTATGTTTTTTATTGACAACCTTTGGCATTGTTTATTGTCAGTAACGGGA  | 60 |
| <i>sey</i> 7 | ATGAAAGCGAAACTATGTTTTTTATTGACAACCTTTGGCATTGTTTATTGTCAGTAACGGAA  | 60 |
| <i>sey</i> 5 | ATGAAAGCTAAACTATGGTTTTTTATTGACAACCTTTGGCATTGTTTATTGTCAGTAACGGGA | 60 |
| <i>sey</i> 3 | ATGAAAGCTAAACTATGGTTTTTTATTGACAACCTTTGGCATTGTTTATTGTCAGTAACGGGA | 60 |
|              | ***** **                                                        |    |

```

sey4      TCTATTGGAATAGCAGAAGTAAAAGCAAAAACAACCTGGATTGATTACAGAAAATAGTAAT 120
sey1      TCTATTGGAATAGCAGAAGTAAAAGCAAAAACAACCTGGATTGATTACAGAAAATAGTAAT 120
sey6      TCTATTGGAATAGCAGAAGTAAAAGCAAAAACAACCTGGATTGATTACAGAAAATAGTAAT 120
sey2      TCTATTGGAATAGCAGAAGTAAAAGCAAAAACAACCTGGATTGATTACAGAAAATAGTAAT 120
sey7      TCTATTGGAATAGCAGAAGTAAAAGCAAAAACAACCTGGATTGATTACAGAAAATAGTAAT 120
sey5      TCTATTGGAATAGCAGAAGTAAAAGCAAAAACAACCTGGATTGATTACAGAAAATAGTAAT 120
sey3      TCTATTGGAATAGCAGAAGTAAAAGCAAAAACAACCTGGATTGATTACAGAAAATAGTAAT 120
*****

sey4      GACAGTTTAAAAGAGCATTATGCACAAAAATTTGAAGTTTATACGAATAAAGAAGTAACA 180
sey1      GACAGTTTAAAAGAGCATTATGCACAAAAATTTGAAGTTTATACGAATAAAGAAGTAACA 180
sey6      GACAGTTTAAAAGAGCATTATGCACAAAAATTTGAAGTTTATACGAATAAAGAAGTAACA 180
sey2      GACAGTTTAAAAGAGCATTATGCACAAAAATTTGAAGTTTATACGAATAAAGAAGTAACA 180
sey7      GACAGTTTAAAAGAGCATTATGCACAAAAATTTGAAGTTTATACGAATAAAGAAGTAACA 180
sey5      GACAGTTTAAAAGAGCATTATGCACAAAAATTTGAAGTTTATACGAATAAAGAAGTAACA 180
sey3      GACAGTTTAAAAGAGCATTATGCACAAAAATTTGAAGTTTATACGAATAAAGAAGTAACA 180
*****

sey4      GGAGTTGGGGAAAATTATATAGACGCGAAAGTTGACACCTACAATGTACGGACAGTGCTC 240
sey1      GGAGTTGGGGAAAATTATATAGACGCGAAAGTTGACACCTACAATGTACGGACAGTGCTC 240
sey6      GGAGTTGGGGAAAATTATATAGACGCGAAAGTTGACACCTACAATGTACGGACAGTGCTC 240
sey2      GGAGTTGGGGAAAATTATATAGACGCGAAAGTTGACACCTACAATGTACGGACAGTGCTC 240
sey7      GGAGTTGGGGAAAATTATATAGACGCGAAAGTTGACACCTACAATGTACGGACAGTGCTC 240
sey5      GGAGTTGGGGAAAATTATATAGACGCGAAAGTTGACACCTACAATGTACGGACAGTGCTC 240
sey3      GGAGTTGGGGAAAATTATATAGACGCGAAAGTTGACACCTACAATGTACGGACAGTGCTC 240
*****

sey4      TACAACACTGATTATTTGAAACAGTTTAAAAATCAAGACAAAGTTAATATATGGGGAACA 300
sey1      TACAACACTGATTATTTGAAACAGTTTAAAAATCAAGACAAAGTTAATATATGGGGAACA 300
sey6      TACAACACTGATTATTTGAAACAGTTTAAAAATCAAGACAAAGTTAATATATGGGGAACA 300
sey2      TACAACACTGATTATTTGAAACAGTTTAAAAATCAAGACAAAGTTAATATATGGGGAACA 300
sey7      TACAACACTGATTATTTGAAACAGTTTAAAAATCAAGACAAAGTTAATATATGGGGAACA 300
sey5      TACAACACTGATTATTTGAAACAGTTTAAAAATCAAGACAAAGTTAATATATGGGGAACA 300
sey3      TACAACACTGATTATTTGAAACAGTTTAAAAATCAAGACAAAGTTAATATATGGGGAACA 300
*****

sey4      TTATATGAAAACCAACAATCTAAAGTATATCGTGGCACAGTAGTTAAGTATGATCCTATA 360
sey1      TTATATGAAAACCAACAATCTAAAGTATATCGTGGCACAGTAGTTAAGTATGATCCTATA 360
sey6      TTATATGAAAACCAACAATCTAAAGTATATCGTGGCACAGTAGTTAAGTATGATCCTATA 360
sey2      TTATATGAAAACCAACAATCTAAAGTATATCGTGGCACAGTAGTTAAGTATGATCCTATA 360
sey7      TTATATGAAAACCAACAATCTAAAGTATATCGTGGCACAGTAGTTAAGTATGATCCTATA 360
sey5      TTATATGAAAACCAACAATCTAAAGTATATCGTGGCACAGTAGTTAAGTATGATCCTATA 360
sey3      TTATATGAAAACCAACAATCTAAAGTATATCGTGGCACAGTAGTTAAGTATGATCCTATA 360
*****

sey4      TCAAAAGTAACTAECTTATCTTATAGAATGAACCTGTTTGTAAACGGTCATCAAACATAA 420
sey1      TCAAAAGTAACTAECTTATCTTATAGAATGAACCTGTTTGTAAACGGTCATCAAACATAA 420
sey6      TCAAAAGTAACTAECTTATCTTATAGAATGAACCTGTTTGTAAACGGTCATCAAACATAA 420
sey2      TCAAAAGTAACTAECTTATCTTATAGAATGAACCTGTTTGTAAACGGTCATCAAACATAA 420
sey7      TCAAAAGTAACTAECTTATCTTATAGAATGAACCTGTTTGTAAACGGTCATCAAACATAA 420
sey5      TCAAAAGTAACTAECTTATCTTATAGAATGAACCTGTTTGTAAACGGTCATCAAACATAA 420
sey3      TCAAAAGTAACTAECTTATCTTATAGAATGAACCTGTTTGTAAACGGTCATCAAACATAA 420
*****

sey4      GTCAATCCAGACAGTTTATTAGAAGTTAAGAATAAACAGATTTCTCTAAAAGAAACAGAT 480
sey1      GTCAATCCAGACAGTTTATTAGAAGTTAAGAATAAACAGATTTCTCTAAAAGAAACAGAT 480
sey6      GTGAATCCAGACAGTTTATTAGAAGTTAAGAATAAACAGATTTCTCTAAAAGAAACAGAT 480
sey2      GTGAATCCAGACAGTTTATTAGAAGTTAAGAATAAACAGATTTCTCTAAAAGAAACAGAT 480
sey7      GTGAATCCAGACAGTTTATTAGAAGTTAAGAATAAACAGATTTCTCTAAAAGAAACAGAT 480
sey5      GTGAATCCAGACAGTTTATTAGAAGTTAAGAATAAACAGATTTCTCTAAAAGAAACAGAT 480
sey3      GTGAATCCAGACAGTTTATTAGAAGTTAAGAATAAACAGATTTCTCTAAAAGAAACAGAT 480
** *****

```

```

sey4      TTTAGAATTAGAAAATATTTATTAGAAAAAGAACACCTATATAGTAATTACAATTCAGGG  540
sey1      TTTAGAATTAGAAAATATTTATTAGAAAAAGAACACCTATATAGTAATTACAATTCAGGG  540
sey6      TTTAGAATTAGAAAATATTTATTAGAAAAAGAACACCTATATAGTAATTACAATTCAGGG  540
sey2      TTTAGAATTAGAAAATATTTATTAGAAAAAGAACACCTATATAGTAATTACAATTCAGGG  540
sey7      TTTAGAATTAGAAAATATTTATTAGAAAAAGAACACCTATATAGTAATTACAATTCAGGG  540
sey5      TTTAGAATTAGAAAATATTTATTAGAAAAAGAACACCTATATAGTAATTACAATTCAGGG  540
sey3      TTTAGAATTAGAAAATATTTATTAGAAAAAGAACACCTATATAGTAATTACAATTCAGGT  540
          *****

sey4      GAACTAATTGTAGAAATGAAAAATGGAGCAAGACATAAAATAGATTTATGCGCATATTG    600
sey1      GAACTAATTGTAGAAATGAAAAATGGAGCAAGACATAAAATAGATTTAGGCGCATATTG    600
sey6      GAACTAATTATAGAAATGAAAAATGGAGCAAGACATAAAATAGATTTAGGCGCATATTG    600
sey2      GAACTAATTATAGAAATGAAAAATGGAGCAAGACATAAAATAGATTTAGGCGCATATTG    600
sey7      GAACTAATTATAGAAATGAAAAATGGAGCAAGACATAAAATAGATTTAGGCGCATATTG    600
sey5      GAACTAATTATAGAAATGAAAAATGGAGCAAGACATAAAATAGATTTAGGCGCATATTG    600
sey3      GAACTAATTATAGAAATGAAAAATGGAGCAAGACATAAAATAGATTTAGGCGCATATTG    600
          *****

sey4      AGCGACTCACAAGAAAAAACGTTTGATTTTGATAATATTAGTCATATAGATATTTATATG   660
sey1      AGCGACTCACAAGAAAAAACGTTTGATTTTGATAATATTAGTCATATAGATATTTATATG   660
sey6      AGTGACTCACAAGAAAAAACGTTTGATTTTGATAATATTAGTCATATAGATATTTATATG   660
sey2      AGTGACTCACAAGAAAAAACGTTTGATTTTGATAATATTAGTCATATAGATATTTATATG   660
sey7      AGTGACTCACAAGAAAAAACGTTTGATTTTGATAATATTAGTCATATAGATATTTATATG   660
sey5      AGTGACTCACAAGAAAAAACGTTTGATTTTGATAATATTAGTCATATAGATATTTATATG   660
sey3      AGTGACTCACAAGAAAAAACGTTTGATTTTGATAATATTAGTCATATAGATATTTATATG   660
          ** *****

sey4      AAATAG  666
sey1      AAATAG  666
sey6      AAATAG  666
sey2      AAATAG  666
sey7      AAATAG  666
sey5      AAATAA  666
sey3      AAATAG  666
          *****

```

**Figure S1.** Alignment of amino acid (a) and nucleotide (b) sequences of SEY (sey1-sey7). Asterisk indicates identical amino acid or nucleotide. Amino acids that are different from those of SEY1 are marked in yellow.

(a)

|                     |                                                                |    |
|---------------------|----------------------------------------------------------------|----|
| SC761-coaVa-ST121   | MILGEFEVKYLTGFILILLLEGILTNASASAI EYSDLHHKSKLNSKRLSNAKMSFINPTQL | 60 |
| SC1133-coaVa-ST121  | MILGEFEVKYLTGFILILLLEGILTNASASAI EYSDLHHKSKLNSKRLSNAKMSFINPTQL | 60 |
| SC1137-coaVa-ST121  | MILGEFEVKYLTGFILILLLEGILTNASASAI EYSDLHHKSKLNSKRLSNAKMSFINPTQL | 60 |
| SC732-coaVa-ST121   | MILGEFEVKYLTGFILILLLEGILTNASASAI EYSDLHHKSKLNSKRLSNAKMSFINPTQL | 60 |
| SC533-coaVIIb-ST45  | MILGEFEVKYLTGFILILLLEGILTNASASAI EYSDLHHKSKFNSKRLSNAKMSFANPTDL | 60 |
| SC465-coaIIa-ST764  | --MGEFEVKYLTGFILILLLEGIFTNSASAI EYSDLHHKSKFDSKRLSNAKMSFINPTQL  | 58 |
| SC792-coaIIa-ST5    | --MGEFEVKYLTGFILILLLEGIFTNSASAI EYSDLHHKSKFDSKRLSNAKMSFINPTQL  | 58 |
| SC936-coaIIa-ST5    | --MGEFEVKYLTGFILILLLEGIFTNSASAI EYSDLHHKSKFDSKRLSNAKMSFINPTQL  | 58 |
| SC955-coaIIa-ST5    | --MGEFEVKYLTGFILILLLEGIFTNSASAI EYSDLHHKSKFDSKRLSNAKMSFINPTQL  | 58 |
| SC1096-coaVb-ST5425 | MILGEFEVKYLTGFILILLLEGIFTNSASAI EYSDLHHKSKFDSKRLSNAKMSFINPTQL  | 60 |
| SC519-coaIVa-ST30   | --MGEFEVKYLTGFILILLLEGIFTNSASAI EYSDLHHKSKLDSKRLYNKVSFANPTDL   | 58 |
| SC1130-coaIIIa-ST8  | --MGEFEVKYLTGFILILLLEGIFTNSASAI EYSDLHHKSKFDSKRLSNAKMSFINPTQL  | 58 |
| SC526-coaIIIa-ST8   | --MGEFEVKYLTGFILILLLEGIFTNSASAI EYSDLHHKSKFDSKRLSNAKMSFINPTQL  | 58 |
| SC625-coaIIIa-ST8   | --MGEFEVKYLTGFILILLLEGIFTNSASAI EYSDLHHKSKFDSKRLSNAKMSFINPTQL  | 58 |
| SC546-coaIIIa-ST8   | --MGEFEVKYLTGFILILLLEGIFTNSASAI EYSDLHHKSKFDSKRLSNAKMSFINPTQL  | 58 |
| SC1019-coaIIIa-ST8  | --MGEFEVKYLTGFILILLLEGIFTNSASAI EYSDLHHKSKFDSKRLSNAKMSFINPTQL  | 58 |
| SC635-coaVIIa-ST1   | --MGEFEVKYLTGFILILLLEGIFTNSASAI EYSDLHHKSKFDSKRLSNAKMSFINPTQL  | 58 |
| SC458-coaVIIa-ST1   | --MGEFEVKYLTGFILILLLEEILTNASASAI EYSDLHHKSKFDSKRLSNAKMSFINPTQL | 58 |
| SC470-coaVIIa-ST1   | --MGEFEVKYLTGFILILLLEEILTNASASAI EYSDLHHKSKFDSKRLSNAKMSFINPTQL | 58 |
| SC560-coaVIIa-ST1   | --MGEFEVKYLTGFILILLLEEILTNASASAI EYSDLHHKSKFDSKRLSNAKMSFINPTQL | 58 |
| SC735-coaIa-ST89    | --MGEFEVKYLTGFILILLLEGIFTNSASAI EYSDLHHKSELDSKRLYNKVSFANPTQL   | 58 |
| SC756-coaIa-ST89    | --MGEFEVKYLTGFILILLLEGIFTNSASAI EYSDLHHKSELDSKRLYNKVSFANPTQL   | 58 |
| SC778-coaIa-ST89    | --MGEFEVKYLTGFILILLLEGIFTNSASAI EYSDLHHKSELDSKRLYNKVSFANPTQL   | 58 |
| SC912-coaVIIb-ST45  | --MGEFEVKYLTGFILILLLEGIFTNSASAI EYSDLHHKSKLDSKRLYNKVSFANPTDL   | 58 |

:\*\*\*\*\* \*:\*:\*:\*:\* \*:\*:\*:\*:\*: :\*:\*:\* \*:\*:\*:\* \*:\*:\*:

|                     |                                                                |     |
|---------------------|----------------------------------------------------------------|-----|
| SC761-coaVa-ST121   | ENKKTNDRLLLTHDLLFHDMLNDASKKDFKVEFENEALSNEFINKNIDIYAGSYSYEGCHG  | 120 |
| SC1133-coaVa-ST121  | ENKKTNDRLLLTHDLLFHDMLNDASKKDFKVEFENEALSNEFINKNIDIYAGSYSYEGCHG  | 120 |
| SC1137-coaVa-ST121  | ENKKTNDRLLLTHDLLFHDMLNDASKKDFKVEFENEALSNEFINKNIDIYAGSYSYEGCHG  | 120 |
| SC732-coaVa-ST121   | ENKKTNDRLLLTHDLLFHDMLNDASKKDFKVEFENEALSNEFINKNIDIYAGSYSYEGCHG  | 120 |
| SC533-coaVIIb-ST45  | ENKKTNDRLLLTHDLLFHDMLNDASKKDFKVEFENEALSNEFINKNIDIYAGSYSYEGCHG  | 120 |
| SC465-coaIIa-ST764  | ENKNTNDRLLLKHDLLFHDMLVNDASKKDFKVEFENEALSNEFINKNIDIYAGSYSYEGCHG | 118 |
| SC792-coaIIa-ST5    | ENKNTNDRLLLKHDLLFHDMLVNDASKKDFKVEFENEALSNEFINKNIDIYAGSYSYEGCHG | 118 |
| SC936-coaIIa-ST5    | ENKNTNDRLLLKHDLLFHDMLVNDASKKDFKVEFENEALSNEFINKNIDIYAGSYSYEGCHG | 118 |
| SC955-coaIIa-ST5    | ENKNTNDRLLLKHDLLFHDMLVNDASKKDFKVEFENEALSNEFINKNIDIYAGSYSYEGCHG | 118 |
| SC1096-coaVb-ST5425 | ENKNTNDRLLLKHDLLFHDMLVNDASKKDFKVEFENEALSNEFINKNIDIYAGSYSYEGCHG | 120 |
| SC519-coaIVa-ST30   | ENKKTNDRLLLKHDLLFHDMLNDASKKDFKVEFENEALSNEFINKNIDVYAGSYSYEGCHG  | 118 |
| SC1130-coaIIIa-ST8  | ENKNTNDRLLLKHDLLFHDMLVNDASKKDFKVEFENEALSNEFINKNIDIFAGNYGYGCHG  | 118 |
| SC526-coaIIIa-ST8   | ENKNTNDRLLLKHDLLFHDMLVNDASKKDFKVEFENEALSNEFINKNIDIFAGNYGYGCHG  | 118 |
| SC625-coaIIIa-ST8   | ENKNTNDRLLLKHDLLFHDMLVNDASKKDFKVEFENEALSNEFINKNIDIFAGNYGYGCHG  | 118 |
| SC546-coaIIIa-ST8   | ENKNTNDRLLLKHDLLFHDMLVNDASKKDFKVEFENEALSNEFINKNIDIFAGNYGYGCHG  | 118 |
| SC1019-coaIIIa-ST8  | ENKNTNDRLLLKHDLLFHDMLVNDASKKDFKVEFENEALSNEFINKNIDIFAGNYGYGCHG  | 118 |
| SC635-coaVIIa-ST1   | ENKNTNDRLLLKHDLLFHDMLVNDASKKDFKVEFENEALSNEFINKNIDIFAGNYGYGCHG  | 118 |
| SC458-coaVIIa-ST1   | ENKNTNDRLLLKHDLLFHDMLVNDASKKDFKVEFENEALSNEFINKNIDIFAGNYGYGCHG  | 118 |
| SC470-coaVIIa-ST1   | ENKNTNDRLLLKHDLLFHDMLVNDASKKDFKVEFENEALSNEFINKNIDIFAGNYGYGCHG  | 118 |
| SC560-coaVIIa-ST1   | ENKNTNDRLLLKHDLLFHDMLVNDASKKDFKVEFENEALSNEFINKNIDIFAGNYGYGCHG  | 118 |
| SC735-coaIa-ST89    | ENKKTNDRLLLKHDLLFHDMLVNDASKKDFKVEFENEALSNEFINKNIDIFAGNYGYGCHG  | 118 |
| SC756-coaIa-ST89    | ENKKTNDRLLLKHDLLFHDMLVNDASKKDFKVEFENEALSNEFINKNIDIFAGNYGYGCHG  | 118 |
| SC778-coaIa-ST89    | ENKKTNDRLLLKHDLLFHDMLVNDASKKDFKVEFENEALSNEFINKNIDIFAGNYGYGCHG  | 118 |
| SC912-coaVIIb-ST45  | ENKKTNDRLLLKHDLLFHDMLVNDASKKDFKVEFENEALSNEFINKNIDIFAGNYGYGCHG  | 118 |

\*\*\*:\*\*\*, \*\*\*\*\*:\* \*:\*:\*:\*:\*: :\*:\*:\* \*:\*:\*:\* \*:\*:\*:

|                      |                                                               |     |
|----------------------|---------------------------------------------------------------|-----|
| SC761-coaVa-ST121    | GETNKTQCSYGGVTLSDNNKYDDYKNIPCNLWIDGHQTEIELTAVKTKKKIVTIQELDVQ  | 180 |
| SC1133-coaVa-ST121   | GETNKTQCSYGGVTLSDNNKYDDYKNIPCNLWIDGHQTEIELTAVKTKKKIVTIQELDVQ  | 180 |
| SC1137-coaVa-ST121   | GETNKTQCSYGGVTLSDNNKYDDYKNIPCNLWIDGHQTEIELTAVKTKKKIVTIQELDVQ  | 180 |
| SC732-coaVa-ST121    | GETNKTQCSYGGVTLSDNNKYDDYKNIPCNLWIDGHQTEIELTAVKTKKKIVTIQELDVQ  | 180 |
| SC533-coaVIIb-ST45   | GATNKTQCSYGGVTLSDNNKYDDYKNIPCNLWIDGHQTEKELTAVKTKKKIVTIQELDVQ  | 180 |
| SC465-coaIIa-ST764   | GATNKTQCSYGGVTLSDNNK-----                                     | 138 |
| SC792-coaIIa-ST5     | GATNKTQCSYGGVTLSDNNK-----                                     | 138 |
| SC936-coaIIa-ST5     | GATNKTQCSYGGVTLSDNNK-----                                     | 138 |
| SC955-coaIIa-ST5     | GATNKTQCSYGGVTLSDNNK-----                                     | 138 |
| SC1096-coaVb- ST5425 | GATNKTQCSYGGVTLSDNNK-----                                     | 140 |
| SC519-coaIVa-ST30    | GETNKTQCSYGGVTLSDNNKYDDYKNIPCNLWIDGHQTEIELTAVKTKK-----        | 167 |
| SC1130-coaIIIa-ST8   | GATNKTQCSYGGVTLSDNNKYDDYKNIPCNLWIDGHQTEIELTAVKTKKKIVTIQELELVQ | 178 |
| SC526-coaIIIa-ST8    | GATNKTQCSYGGVTLSDNNKYDDYKNIPCNLWIDGHQTEIELTAVKTKKKIVTIQELELVQ | 178 |
| SC625-coaIIIa-ST8    | GATNKTQCSYGGVTLSDNNKYDDYKNIPCNLWIDGHQTEIELTAVKTKKKIVTIQELELVQ | 178 |
| SC546-coaIIIa-ST8    | GATNKTQCSYGGVTLSDNNKYDDYKNIPCNLWIDGHQTEIELTAVKTKKKIVTIQELELVQ | 178 |
| SC1019-coaIIIa-ST8   | GATNKTQCSYGGVTLSDNNKYDDYKNIPCNLWIDGHQTEIELTAVKTKKKIVTIQELELVQ | 178 |
| SC635-coaVIIa-ST1    | GATNKTQCSYGGVTLSDNNKYDDYKNIPCNLWIDGHQTEIELTAVKTKKKIVTIQELELVQ | 178 |
| SC458-coaVIIa-ST1    | GATNKTQCSYGGVTLSDNNKYDDYKNIPCNLWIDGHQAEIELTAVKTKKKIVTIQELDVQ  | 178 |
| SC470-coaVIIa-ST1    | GATNKTQCSYGGVTLSDNNKYDDYKNIPCNLWIDGHQAEIELTAVKTKKKIVTIQELDVQ  | 178 |
| SC560-coaVIIa-ST1    | GATNKTQCSYGGVTLSDNNKYDDYKNIPCNLWIDGHQAEIELTAVKTKKKIVTIQELDVQ  | 178 |
| SC735-coaIa-ST89     | GETNKTLCYGGVTLSDNNKYDDYKNIPCNLWIDGHQTGIELTAVKTKKKIVTIQELDVQ   | 178 |
| SC756-coaIa-ST89     | GETNKTLCYGGVTLSDNNKYDDYKNIPCNLWIDGHQTGIELTAVKTKKKIVTIQELDVQ   | 178 |
| SC778-coaIa-ST89     | GETNKTLCYGGVTLSDNNKYDDYKNIPCNLWIDGHQTGIELTAVKTKKKIVTIQELDVQ   | 178 |
| SC912-coaVIIb-ST45   | GETNKTQCSYGGVTLSDNNKYDNDKNIPCNLWIDGHQTEIELTAVKTKKKIVTIQELDVQ  | 178 |

\* \*\*\*\* \*\*\*\*\*

|                      |                                                              |     |
|----------------------|--------------------------------------------------------------|-----|
| SC761-coaVa-ST121    | LRNYLSEKYKLYEKGGDIVKGYVKYHNDDEKNVEYDFYNLNGEYGHVLEKMYADNKTINS | 240 |
| SC1133-coaVa-ST121   | LRNYLSEKYKLYEKGGDIVKGYVKYHNDDEKNVEYDFYNLNGEYGHVLEKMYADNKTINS | 240 |
| SC1137-coaVa-ST121   | LRNYLSEKYKLYEKGGDIVKGYVKYHNDDEKNVEYDFYNLNGEYGHVLEKMYADNKTINS | 240 |
| SC732-coaVa-ST121    | LRNYLSEKYKLYEKGGDIVKGYVKYHNDDEKNVEYDFYNLNGEYGHVLEKMYADNKTINS | 240 |
| SC533-coaVIIb-ST45   | LRNYLSEKYKLYEKGGDIVKGYVKYHNDDEKNVEYDFYNLNGEYGHVLEKMYADNKTINS | 240 |
| SC465-coaIIa-ST764   | -----                                                        | 138 |
| SC792-coaIIa-ST5     | -----                                                        | 138 |
| SC936-coaIIa-ST5     | -----                                                        | 138 |
| SC955-coaIIa-ST5     | -----                                                        | 138 |
| SC1096-coaVb- ST5425 | -----                                                        | 140 |
| SC519-coaIVa-ST30    | -----                                                        | 167 |
| SC1130-coaIIIa-ST8   | LRNYLSEKYKLYEKGGDIVKGYVKYHNDDEKNVEYDFYNLNGEYGHVLEKMYADNKTINS | 238 |
| SC526-coaIIIa-ST8    | LRNYLSEKYKLYEKGGDIVKGYVKYHNDDEKNVEYDFYNLNGEYGHVLEKMYADNKTINS | 238 |
| SC625-coaIIIa-ST8    | LRNYLSEKYKLYEKGGDIVKGYVKYHNDDEKNVEYDFYNLNGEYGHVLEKMYADNKTINS | 238 |
| SC546-coaIIIa-ST8    | LRNYLSEKYKLYEKGGDIVKGYVKYHNDDEKNVEYDFYNLNGEYGHVLEKMYADNKTINS | 238 |
| SC1019-coaIIIa-ST8   | LRNYLSEKYKLYEKGGDIVKGYVKYHNDDEKNVEYDFYNLNGEYGHVLEKMYADNKTINS | 238 |
| SC635-coaVIIa-ST1    | LRNYLSEKYKLYEKGGDIVKGYVKYHNDDEKNVEYDFYNLNGEYGHVLEKMYADNKTINS | 238 |
| SC458-coaVIIa-ST1    | LRNYLSEKYKLYEKGGDIVKGYVKYHNDDEKNVEYDFYNLNGEYGHVLEKMYADNKTINS | 238 |
| SC470-coaVIIa-ST1    | LRNYLSEKYKLYEKGGDIVKGYVKYHNDDEKNVEYDFYNLNGEYGHVLEKMYADNKTINS | 238 |
| SC560-coaVIIa-ST1    | LRNYLSEKYKLYEKGGDIVKGYVKYHNDDEKNVEYDFYNLNGEYGHVLEKMYADNKTINS | 238 |
| SC735-coaIa-ST89     | LRNYLSEKYKLYELGGDIVKGYVKYHNDDEKNVEYDFYNLNGEYGHVLEKMYADNKTINS | 238 |
| SC756-coaIa-ST89     | LRNYLSEKYKLYELGGDIVKGYVKYHNDDEKNVEYDFYNLNGEYGHVLEKMYADNKTINS | 238 |
| SC778-coaIa-ST89     | LRNYLSEKYKLYELGGDIVKGYVKYHNDDEKNVEYDFYNLNGEYGHVLEKMYADNKTINS | 238 |
| SC912-coaVIIb-ST45   | LRNYLSEKYKLYEKGGDIVKGYVKYHNDDEKNVEYDFYNLNGEYGHVLEKMYADNKTINS | 238 |

|                     |              |     |
|---------------------|--------------|-----|
| SC761-coaVa-ST121   | DKLHLDIYLFKS | 252 |
| SC1133-coaVa-ST121  | DKLHLDIYLFKS | 252 |
| SC1137-coaVa-ST121  | DKLHLDIYLFKS | 252 |
| SC732-coaVa-ST121   | DKLHLDIYLFKS | 252 |
| SC533-coaVIIb-ST45  | DKLHLDIYLFKS | 252 |
| SC465-coaIIa-ST764  | -----        | 138 |
| SC792-coaIIa-ST5    | -----        | 138 |
| SC936-coaIIa-ST5    | -----        | 138 |
| SC955-coaIIa-ST5    | -----        | 138 |
| SC1096-coaVb-ST5425 | -----        | 140 |
| SC519-coaIVa-ST30   | -----        | 167 |
| SC1130-coaIIIa-ST8  | DKLHLDIYLFKS | 250 |
| SC526-coaIIIa-ST8   | DKLHLDIYLFKS | 250 |
| SC625-coaIIIa-ST8   | DKLHLDIYLFKS | 250 |
| SC546-coaIIIa-ST8   | DKLHLDIYLFKS | 250 |
| SC1019-coaIIIa-ST8  | DKLHLDIYLFKS | 250 |
| SC635-coaVIIa-ST1   | DKLHLDIYLFKS | 250 |
| SC458-coaVIIa-ST1   | DKLHLDIYLFKS | 250 |
| SC470-coaVIIa-ST1   | DKLHLDIYLFKS | 250 |
| SC560-coaVIIa-ST1   | DKLHLDIYLFKS | 250 |
| SC735-coaIa-ST89    | DKLHLDIYLFKS | 250 |
| SC756-coaIa-ST89    | DKLHLDIYLFKS | 250 |
| SC778-coaIa-ST89    | DKLHLDIYLFKS | 250 |
| SC912-coaVIIb-ST45  | DKLHLDIYLFKS | 250 |

**(b)**

|                 |                                                              |    |
|-----------------|--------------------------------------------------------------|----|
| SC761-selw7     | MILGEFEVKYLTGFILILLLEGILTNSASAIEYSDLHHKSKLNSKRLSNAKMSFINPTQL | 60 |
| TD101-selw10    | -----MLEEILTNSVSAIEYSDLHHKSKLNSKRLYNKVSFANPTDL               | 42 |
| K17-selw9       | -----MLEGIFTNSASAIEYSDLHHKSKLNSKRLYNKVSFANPTDL               | 42 |
| SC465-selw4     | --MGEFEVKYLTGFILILLLEGIFTNSASAIEYSDLHHKSKFDSKRLSNAKMSFINPTQL | 58 |
| N315-selw4      | --MGEFEVKYLTGFILILLLEGIFTNSASAIEYSDLHHKSKFDSKRLSNAKMSFINPTQL | 58 |
| TD3-selw5       | --MGEFEVKYLTGFILILLLEGIFTNSASAIEYSDLHHKSKFDSKRLSNAKMSFINPTQL | 58 |
| MW2-selw3       | -----MTNSASAIEYSDLHHKSKFDSKRLSNAKMSFINPTQL                   | 37 |
| TD21-selw3      | -----MLEEILTNSASAIEYSDLHHKSKFDSKRLSNAKMSFINPTQL              | 42 |
| SC458-selw3     | --MGEFEVKYLTGFILILLLEEILTNSASAIEYSDLHHKSKFDSKRLSNAKMSFINPTQL | 58 |
| TD115-selw3     | -----MLEEILTNSASAIEYSDLHHKSKFDSKRLSNAKMSFINPTQL              | 42 |
| SC1130-selw2    | --MGEFEVKYLTGFILILLLEGIFTNSASAIEYSDLHHKSKFDSKRLSNAKMSFINPTQL | 58 |
| COL-selw2       | --MGEFEVKYLTGFILILLLEGIFTNSASAIEYSDLHHKSKFDSKRLSNAKMSFINPTQL | 58 |
| TD8-selw6       | --MGEFEVKYLTGFILILLLEGIFTNSASAIEYSDLHHKSKFDSKRLSNAKMSFINPTQL | 58 |
| RF122-selw1c    | --MGEFEVKYLTGFILILLLEGIFTNSASAIEYSDLHHKSKLDSKGLYNKVSFANPTDL  | 58 |
| SC519-selw8     | --MGEFEVKYLTGFILILLLEGIFTNSASAIEYSDLHHKSKLDSKRLYNKVSFANPTDL  | 58 |
| TCH60-selw8     | --MGEFEVKYLTGFILILLLEGIFTNSASAIEYSDLHHKSKLDSKRLYNKVSFANPTDL  | 58 |
| SC756-selw1a    | --MGEFEVKYLTGFILILLLEGIFTNSASAIEYSDLHHKSELDSKRLYNKVSFANPTQL  | 58 |
| Tager104-selw1c | MILGEFEVKYLTGFILILLLEGIFTNSASAIEYSDLHHKSKLDSKGLYNKVSFANPTDL  | 60 |
| TD123-selw1b    | --MGEFEVKYLTGFILILLLEGIFTNSASAIEYSDLHHKSKLDSKRLYNKVSFANPTDL  | 58 |
| ISU926-selw1d   | --MGEFEVKYLTGFILILLLEGIFTNSASAIEYSDLHHKSKLDSKRLYNKVSFANPTDL  | 58 |

:\*\*\*.\*\*\*\*\*:\*\*\* \* \*\*:\* \*\* \*\*:

|                 |                                                              |     |
|-----------------|--------------------------------------------------------------|-----|
| SC761-selw7     | ENKKTNDRLRLTHDLLFHDMFLNDASKKDFKVEFENEALSNEFINKNIDYAGSYSYECHG | 120 |
| TD101-selw10    | ENKNTNDRLRLKHDLLFHDMFVNVASKKDFKVEFENEALSNEFINKNIDYAGNYGYGCHG | 102 |
| K17-selw9       | ENKNTNDRLRLKHDLLFHDMFVNVASKKDFKVEFENEALSNEFINKNIDYAGSYSYECHG | 102 |
| SC465-selw4     | ENKNTNDRLRLKHDLLFHDMFVNVASKKDFKVEFENEALSNEFINKNIDYAGSYSYECHG | 118 |
| N315-selw4      | ENKNTNDRLRLKHDLLFHDMFVNVASKKDFKVEFENEALSNEFINKNIDYAGSYSYECHG | 118 |
| TD3-selw5       | ENKNTNDRLRLKHDLLFHDMFVNVASKKDFKVEFENEALSNEFINKNIDYAGSYSYECHG | 118 |
| MW2-selw3       | ENKNTNDRLRLKHDLLFHDMFVNVASKKDFKVEFENEALSNEFINKNIDYAGNYGYGCHG | 97  |
| TD21-selw3      | ENKNTNDRLRLKHDLLFHDMFVNVASKKDFKVEFENEALSNEFINKNIDYAGNYGYGCHG | 102 |
| SC458-selw3     | ENKNTNDRLRLKHDLLFHDMFVNVASKKDFKVEFENEALSNEFINKNIDYAGNYGYGCHG | 118 |
| TD115-selw3     | ENKNTNDRLRLKHDLLFHDMFVNVASKKDFKVEFENEALSNEFINKNIDYAGNYGYGCHG | 102 |
| SC1130-selw2    | ENKNTNDRLRLKHDLLFHDMFVNVASKKDFKVEFENEALSNEFINKNIDYAGNYGYGCHG | 118 |
| COL-selw2       | ENKNTNDRLRLKHDLLFHDMFVNVASKKDFKVEFENEALSNEFINKNIDYAGNYGYGCHG | 118 |
| TD8-selw6       | ENKNTNDRLRLKHDLLFHDMFVNVASKKDFKVEFENEALSNEFINKNIDYAGNYGYGCHG | 118 |
| RF122-selw1c    | ENKKTNDRLRLKHDLLFHDMFVNVASKKDFKVEFENEALSNEFINKNIDYAGNYGYECHG | 118 |
| SC519-selw8     | ENKKTNDRLRLKHDLLFHDMFLNDAWKDLKVEFENEALSNEFINKNIDVYAGSYSYECHG | 118 |
| TCH60-selw8     | ENKKTNDRLRLKHDLLFHDMFLNDAWKDLKVEFENEALSNEFINKNIDVYAGSYSYECHG | 118 |
| SC756-selw1a    | ENKKTNDRLRLKHDLLFHDMFVNVASKKDFKVEFENEALSNEFINKNIDYAGNYGYGCHG | 118 |
| Tager104-selw1c | ENKKTNDRLRLKHDLLFHDMFVNVASKKDFKVEFENEALSNEFINKNIDYAGNYGYGCHG | 120 |
| TD123-selw1b    | ENKKTNDRLRLKHDLLFHDMFVNVASKKDFKVEFENEALSNEFINKNIDYAGNYGYGCHG | 118 |
| ISU926-selw1d   | ENKKTNDRLRLKHDLLFHDMFVNVASKKDFKVEFENEALSNEFINKNIDYAGNYGYGCHG | 118 |

\*\*\*:!:\*\*\*\*, \*\*\*\*\*: \*    \*\*!:\*\*\*\*\*: :!:\*:!:\*. \* \* \*\*

|                 |                                                               |     |
|-----------------|---------------------------------------------------------------|-----|
| SC761-selw7     | GETNKTQCSYGGVTLSDNNKYDDYKNIPCNLWIDGHQTEIELTAVKTKKKIVTIQELDVQ  | 180 |
| TD101-selw10    | GATNKTQCSYGGVTLSDNNKYDDYKNIPCNLWIDGHQTEIELTAVKTKKKIVTIQELEVVQ | 162 |
| K17-selw9       | GATNKTQCSYGGVTLSDNNK-----                                     | 122 |
| SC465-selw4     | GATNKTQCSYGGVTLSDNNK-----                                     | 138 |
| N315-selw4      | GATNKTQCSYGGVTLSDNNK-----                                     | 138 |
| TD3-selw5       | GATNKTQCSYGGVTLSDNNKYDDYKNIPCNLWIDGHQAEIELTAVKTKKKIVTIQELDVQ  | 178 |
| MW2-selw3       | GATNKTQCSYGGVTLSDNNKYDDYKNIPCNLWIDGHQAEIELTAVKTKKKIVTIQELDVQ  | 157 |
| TD21-selw3      | GATNKTQCSYGGVTLSDNNKYDDYKNIPCNLWIDGHQAEIELTAVKTKKKIVTIQELDVQ  | 162 |
| SC458-selw3     | GATNKTQCSYGGVTLSDNNKYDDYKNIPCNLWIDGHQAEIELTAVKTKKKIVTIQELDVQ  | 178 |
| TD115-selw3     | GATNKTQCSYGGVTLSDNNKYDDYKNIPCNLWIDGHQAEIELTAVKTKKKIVTIQELDVQ  | 162 |
| SC1130-selw2    | GATNKTQCSYGGVTLSDNNKYDDYKNIPCNLWIDGHQTEIELTAVKTKKKIVTIQELEVVQ | 178 |
| COL-selw2       | GATNKTQCSYGGVTLSDNNKYDDYKNIPCNLWIDGHQTEIELTAVKTKKKIVTIQELEVVQ | 178 |
| TD8-selw6       | GATNKTQCSYGGVTLSDNNKYDDYKNIPCNLWIDGHQAEIELTAVKTKKKIVTIQELDVQ  | 178 |
| RF122-selw1c    | GRNQ-----                                                     | 122 |
| SC519-selw8     | GETNKTQCSYGGVTLSDNNKYDDYKNIPCNLWIDGHQTEIELTAVKTKK-----        | 167 |
| TCH60-selw8     | GETNKTQCSYGGVTLSDNNKYDDYKNIPCNLWIDGHQTEIELTAVKTKK-----        | 167 |
| SC756-selw1a    | GETNKTQCSYGGVTLSDNNKYDDYKNIPCNLWIDGHQTEIELTAVKTKKKIVTIQELDVQ  | 178 |
| Tager104-selw1c | GATNKTQCSYGGVTLSDNNKYDDYKNIPCNLWIDGHQTEIELTAVKTKKKIVTIQELDVQ  | 180 |
| TD123-selw1b    | GETNKTQCSYGGVTLSDNNKYDDYKNIPCNLWIDGHQTEIELTAVKTKKKIVTIQELDVQ  | 178 |
| ISU926-selw1d   | GEANKTQCSYGGVTFSDNNKYDDYKNIPCNLWIDGHQTEIELTAVKTKKKIVTIQELDVQ  | 178 |

\* :

|                 |                                                              |     |
|-----------------|--------------------------------------------------------------|-----|
| SC761-selw7     | LRNYLSEKYKLYEKGDDIVKGYVKYHNDDEKNVEYDFYLNNGEYGHEVLKMYADNKTINS | 240 |
| TD101-selw10    | LRNYLNEKYKLYEQGGDIVKGYVKYHNDDEQNVEYDFYLNNGEYGREVLKMYADNKTINS | 222 |
| K17-selw9       | -----                                                        | 122 |
| SC465-selw4     | -----                                                        | 138 |
| N315-selw4      | -----                                                        | 138 |
| TD3-selw5       | LRNYLNEKYKLYEQQGDIVKGYVKYHNDDEQNIEYNFYLNNGEYGYEVLKMYADNKTINS | 238 |
| MW2-selw3       | LRNYLNEKYKLYEQQGDIVKGYVKYHNDDEQNIEYNFYLNNGEYGYEVLKMYADNKTINS | 217 |
| TD21-selw3      | LRNYLNEKYKLYEQQGDIVKGYVKYHNDDEQNIEYNFYLNNGEYGYEILKMYADNKTINS | 222 |
| SC458-selw3     | LRNYLNEKYKLYEQQGDIVKGYVKYHNDDEQNIEYNFYLNNGEYGYEVLKMYADNKTINS | 238 |
| TD115-selw3     | LRNYLNEKYKLYEQQGDIVKGYVKYHNDDEQNIEYNFYLNNGEYGYEVLKMYADNKTINS | 222 |
| SC1130-selw2    | LRNYLNEKYKLYEQQGDIVKGYVKYHNDDEQNVEYDFYLNNGEYGREVLKMYADNKTINS | 238 |
| COL-selw2       | LRNYLNEKYKLYEQQGDIVKGYVKYHNDDEQNVEYDFYLNNGEYGREVLKMYADNKTINS | 238 |
| TD8-selw6       | LRNYLNEKYKLYEQQGDIVKGYVKYHNDDEQNVEYDFYLNNGEYGREVLKMYADNKTINS | 238 |
| RF122-selw1c    | -----                                                        | 122 |
| SC519-selw8     | -----                                                        | 167 |
| TCH60-selw8     | -----                                                        | 167 |
| SC756-selw1a    | LRNYLNEKYKLYELGGDIVKGYVKYHNDDEKNVEYDFYLNNGEYGHEVLKMYADNKTINS | 238 |
| Tager104-selw1c | LRNYLNEKYKLYEQQGDIVKGYVKYHNDDEKNVEYDFYLNNGEYGHEVLKIYADNKTINS | 240 |
| TD123-selw1b    | LRNYLNEKYKLYEQQGDIVKGYVKYHND-EKNVEYDFYLNNGEYGHEVLKMYADNKTINS | 237 |
| ISU926-selw1d   | LRNYLNEKYKLYEQQGDIVKGYVKYHNDDEKNVEYDFYLNNGEYGHEVLKMYADNKTINS | 238 |
|                 |                                                              |     |
| SC761-selw7     | DKLHLDIYLFKS                                                 | 252 |
| TD101-selw10    | DKLHLDIYLFKS                                                 | 234 |
| K17-selw9       | -----                                                        | 122 |
| SC465-selw4     | -----                                                        | 138 |
| N315-selw4      | -----                                                        | 138 |
| TD3-selw5       | DKLHLDIYLFKS                                                 | 250 |
| MW2-selw3       | DKLHLDIYLFKS                                                 | 229 |
| TD21-selw3      | DKLHLDIYLFKS                                                 | 234 |
| SC458-selw3     | DKLHLDIYLFKS                                                 | 250 |
| TD115-selw3     | DKLHLDIYLFKS                                                 | 234 |
| SC1130-selw2    | DKLHLDIYLFKS                                                 | 250 |
| COL-selw2       | DKLHLDIYLFKS                                                 | 250 |
| TD8-selw6       | DKLHLDIYLFKS                                                 | 250 |
| RF122-selw1c    | -----                                                        | 122 |
| SC519-selw8     | -----                                                        | 167 |
| TCH60-selw8     | -----                                                        | 167 |
| SC756-selw1a    | DKLHLDIYLFKS                                                 | 250 |
| Tager104-selw1c | DKLHLDIYLFKS                                                 | 252 |
| TD123-selw1b    | DKLHLDIYLFKS                                                 | 249 |
| ISU926-selw1d   | DKLHLDIYLFKS                                                 | 250 |

**Figure S2.** Alignment of SEIW amino acid sequences of all the MRSA isolates analyzed in the present study (a) and representative strains of all the *selw* phylogenetic groups (b). Asterisk indicates identical amino acid. Dash denotes gap.



SELX14 MFKKHHSKNSILLKSLSLGIIYSGIFGINSKADASIQDSSSVHDKQFQKVEEVPNNSEK 60  
SELX6 MFKKHHSKNSILLKSLSLGIIYSGSFGIYKAGASTQNSSSLQDKQFQKVEEVPNNSEK 60  
SELX11 MFKKHHSKNSILLKSLSLGIIYSGSLGIYSKANASTQNSSSVHDKQLQKVEEVPNNSEK 60  
SELX4 MFKKYDSKNSILLKSLSLGIIYGGTFGIYPKADASTQNSSSVQDKQFQKVEEVPNNSEK 60  
SC533 (SELX16) MFKKHHSKNSIVLKSILSLGIIYGGTFGIYPKADASTQNSSSVQDKQFQKVEEVPNNSEK 60  
TIGER104 (SELX15) MFKKYESKNSIVLKSILSLGIIYGGTFGIYPKADASTQNSSSVQDKQFQKVEEVPNNSEK 60  
SELX5 MFKKNSDKNSILLKSLSLGIIYGGTFGIYPKADASTQNSSSVQDKQFQKVEEVPNNSEK 60  
SELX9 MFKKNSDKNSIVLKSILSLGIIYGGTFGIYPKADASTQNSSSVQDKQLQKVEEVPNNSEK 60  
SELX1 MFKKYDSKNSIVLKSILSLGIIYGGTFGIYPKADASTQNSSSVQDKQLQKVEEVPNNSEK 60  
SELX2 MFKKYDSKNSIVLKSILSLGIIYGGTFGIYPKADASTQNSSSVQDKQLQKVEEVPNNSEK 60  
SELX-BOV2 MFKKHHSKNSIVLKSILSLGIIYGGTFGIYPKADASTQNSSSVQDKQLQKVEEVPNNSEK 60  
SELX0V MFKKYDSKNSIVLKSILSLGIIYGGTFGIYPKADASTQNSSSVQDKQLQKVEEVPNNSEK 60  
SELX7 MFKKYDSKNSIVLKSILSLGIIYGGTFGIYPKADASTQNSSSVQDKQLQKVEEVPNNSEK 60  
SELX12 MFKKYDSKNSIVLKSILSLGIIYGGTFGIYPKADASTQNSSSVQDKQLQKVEEVPNNSEK 60  
SELX10 MFKKYDSKNSIVLKSILSLGIIYGGTFGIYPKADASTQNSSSVQDKQFQKVEEVPNNSEK 60  
SELX-BOV1 MFKKYDSKNSIVLKSILSLGIIYGGTFGIYPKADASTQNSSSVQDKQFQKVEEVPNNSEK 60  
SELX3 MFKKYDSKNSIVLKSILSLGIIYGGTFGIYPKADASTQNSSSVQDKQLQKVEEVPNNSEK 60  
SELX8 MFKKYDSKNSIVLKSILSLGIIYSGSFGIYPKADASTQNSSSVQDKQLQKVEEVPNNSEK 60  
\*\*\*\* .\*\*\*\*\*:\*\*\*\*\*.\* .\*\* \*\*. \*\* \* \* \* :\*\*\*:\*\*\*\*\*

SELX14 ALVKKLYDRYSQNTINGKSNKSRNWVYSERPLNENQVR IHLEGTYTVAGR VYTPKRNI TL 120  
SELX6 ALVKKLYDRYSQNTINGKSNKSRNWVYSERPLNENQVR IHLEGTYTVADR VYTPKRNI TL 120  
SELX11 ALVKKLYDRYSKNTINGKSNKSRNWVYSERPLNGNQVR IHLEGTYTVAGR VYTPKRNI TL 120  
SELX4 TLVKKLYDRYSKNTINGKSNKSRNWVYSERPLNENQVR IHLEGTYRVADR VYTPKRNI TL 120  
SC533 (SELX16) ALVKKLYDRYSKNTINGKSNKSRNWVYSERPLNGNQVR IHLEGTYTVAGR VYTPKRNI TL 120  
TIGER104 (SELX15) ALVKKLYDRYSQNTINGKSNKARNWVYSERPLNENQVR IHLEGTYTVAGR VYTPKRNI TL 120  
SELX5 ALVKKLYDRYSQNTINGKSNKSRNWVYSERPLNENQVR INLEGTYRVADR VYTPKRNI TL 120  
SELX9 ALVKKLYDRYSQNTINGKSNKSRNWVYSERPLNENQVR IHLEGTYRVADR VYTPKRNI TL 120  
SELX1 ALVKKLYDRYSKDTINGKSNKSRNWVYSERPLNENQVR IHLEGTYTVADR VYTPKRNI TL 120  
SELX2 ALVKKLYDRYSKDTINGKSNKSRNWVYSERPLNENQVR IHLEGTYTVAGR VYTPKRNI TL 120  
SELX-BOV2 ALVKKLYDRYSKDTINGKSNKSRNWVYSERPLNENQVR IHLEGTYRVADR VYTPKRNI TL 120  
SELX0V ALVKKLYDRYSKDTINGKSNKARNWVYSERPLNENQVR IHLEGTYRVADR VYTPKRNI TL 120  
SELX7 ALVKKLYDRYSKDTINGKSNKSRNWVYSERPLNENQVR IHLEGTYRVADR VYTPKRNI TL 120  
SELX12 ALVKKLYDRYSKDTINGKSNKSRNWVYSERPLNENQVR IHLEGTYRVADR VYTPKRNI TL 120  
SELX10 ALVKKLYDRYSQNTINGKSNKSRNWVYSERPLNENQVR IHLEGTYTVAGR VYTPKRNI TL 120  
SELX-BOV1 ALVKKLYDRYSQNTINGKSNKARNWVYSERPLNENQVR IHLEGTYRVADR VYTPKRNI TL 120  
SELX3 ALVKKLYDRYSKDTINGKSNKSRNWVYSERPLNENQVR IHLEGTYTVAGR VYTPKRNI TL 120  
SELX8 ALVKKLYDRYSKDTINGKSNKSRNWVYSERPLNENQVR IHLEGTYTVAGR VYTPKRNI TL 120  
:\*\*\*\*\*:\*\*\*\*\*:\*\*\*\*\* \*\*\*\*\*:\*\*\*\*\* \*\*.\*\*\*\*\*

SELX14 NKEVVTLKELDHIIRFAHISYGLYMGEHLPKGNIVINTKDG GK Y T L E S H K E L Q K D R E N V E 180  
SELX6 NKEVITLKELDHIIRFAHISYGLYMGEHLPKGNIVINTKDG GK Y T L E S H K E L Q K D R E N V K 180  
SELX11 NKEVVTLKELDHIIRFAHISYGLYMGEHLPKGNIVINTKNGG K Y T L E S H K E L Q K D R E N V K 180  
SELX4 NKEVVTLKELNHIIRFAHISYGLYMGEHLSKGDIVINTKDG GK Y T L E S H K E L Q K N R E N V K 180  
SC533 (SELX16) NKEVVTLKELDHIIRFAHISYGLYMGEHLPKGNIVINTKNGG K Y T L E S H K E L Q K N R E N V E 180  
TIGER104 (SELX15) NKEVVTLKELDHIIRFAHISYGLYMGEHLPKGNIVINTKNGG K Y T L E S H K E L Q K N R E N V E 180  
SELX5 NKEVVTLKELDHIIRFAHISYGLYMGEHLPKGNIVINTKDG GK Y T L E S H K E L Q K D R E N V K 180  
SELX9 NKEVITLKELDHIIRFAHISYGLYMGEHLPKGNIVINTKNGG K Y T L E S H K E L Q K D R E N V K 180  
SELX1 NKEVVTLKELDHIIRFAHISYGLYMGEHLPKGNIVINTKDG GK Y T L E S H K E L Q K D R E N V K 180  
SELX2 NKEVVTLKELDHIIRFAHISYGLYMGEHLPKGNIVINTKDG GK Y T L E S H K E L Q K D R E N V K 180  
SELX-BOV2 NKEVVTLKELDHIIRFAHISYGLYMGEHLPKGNIVINTKNGG K Y T L E S H K E L Q K D R E N V K 180  
SELX0V NKEVVTLKELDHIIRFAHISYGLYMGEHLPKGNIVINTKNGG K Y T L E S H K E L Q K D R E N V K 180  
SELX7 NKEVITLKELDHIIRFAHISYGLYMGEHLPKGNIVINTKNGG K Y T L E S H K E L Q K D R E N V K 180  
SELX12 NKEVVTLKELDHIIRFAHISYGLYMGEHLPKGNIVINTKDG GK Y T L E S H K E L Q K D R E N V K 180  
SELX10 NKEVVTLKELDHIIRFAHISYGLYMGEHLPKGNIVINTKNGG K Y T L E S H K E L Q K D R E N V K 180  
SELX-BOV1 NKEVVTLKELDHIIRFAHISYGLYMGEHLPKGNIVINTKNGG K Y T L E S H K E L Q K N R E N V E 180  
SELX3 NKEVVTLKELDHIIRFAHISYGLYMGEHLPKGNIVINTKNGG K Y T L E S H K E L Q K N R E N V E 180  
SELX8 NKEVVTLKELDHIIRFAHISYGLYMGEHLPKGNIVINTKNGG K Y T L E S H K E L Q K N R E N V E 180  
\*\*\*:\*\*\*\*\*:\*\*:\*\*\*\*\* \*\*\*\*\* \*\* :\*\*\*\*\*:\*\*\*\*\*:\*\*\*\*\*

|                   |                        |     |
|-------------------|------------------------|-----|
| SELX14            | INTADIKNVTFELVKSVDIEQV | 203 |
| SELX6             | INTADIKNVTFDLVKSVDIEQV | 203 |
| SELX11            | INTDDIKNVTFELVKSVDIEQV | 203 |
| SELX4             | INTADVKNVTFELVKSVDIEQV | 203 |
| SC533 (SELX16)    | INTADVENVTFDLVKSVDIEQV | 203 |
| TIGER104 (SELX15) | INTADVENVTFDLVKSVDIEQV | 203 |
| SELX5             | INTADIKNVTFKLVKSVDIEQV | 203 |
| SELX9             | INTDDIKNVTFELVKSVDIEQV | 203 |
| SELX1             | INTADIKNVTFKLVKSVDIEQV | 203 |
| SELX2             | INTADIKNVTFKLVKSVDIEQV | 203 |
| SELX-BOV2         | INTDDIKNVTFELVKSVDIEQV | 203 |
| SELX0V            | NNTDDIKNVTFELVKSVDIEQV | 203 |
| SELX7             | INTDDIKNVTFELVKSVDIEQV | 203 |
| SELX12            | INTDDIKNVTFELVKSVDIEQV | 203 |
| SELX10            | IKTDDIKNVTFELVKSVDIEQV | 203 |
| SELX-BOV1         | INTDDIKNVTFELVKSVDIEQV | 203 |
| SELX3             | INTDDIKNVTFELVKSVDIEQV | 203 |
| SELX8             | INTDDIKNVTFELVKSVDIEQV | 203 |
|                   | :* *.:****.*** *****   |     |

**Figure S3.** Alignment of SEIX amino acid sequences representing subtypes SEIX1-SEIX16. Asterisk indicates identical amino acid. Among the 17 *selx* alleles described by Wilson et al [21], sequence data were available for 14 subtypes (*selx1-selx14*). Therefore, SEIX sequences of TIGER104 and SC533 which were distinct from SEIX1-SEIX14 were tentatively assigned as SEIX15 and SEIX16. Putative cleavage site of signal peptide is shown by triangle. Sialic acid-binding region reported previously [22,23] is shown in yellow.

```

JKD6159-selz7      MRKVLILITLLFGYSSYLLLEAKAETQNDPNI SELNKASQYTGSWHNIWYLYNSDPVKAK 60
M-selz8           MRKVFILITLLFGYSSYLLLEAKAETQNDPNI SELNKSSQYTGSWHNIWYLYNSDPVNAK 60
SC532-selz6      MRKVFILITLLFGYSSYLLSEAKAETQNDLNI SELNKSSQYTGSWHNIWYLYNSDPVNAK 60
NCTC6131-selz9   MRKVFILITLLFGYSSYLLQAKAETQNDPNI SELNKSSQYTGSWHNIWYLYNSDPVNAK 60
WA-MRSA-59-selz4 MRKVFILITLLFGYSSYLLLEARAETQNDPNI SELNKSSQYTGSWHNIWYLYNSDPVNAK 60
MOK042-selz2     MRKIFILITLLFGYSSYLLLEARAETQNDPNI SELNKSSQYTGSWHNIWYLYNSDPVNAK 60
15584-selz5      MRKVFILITLLFGYSSYLLLEARAETQNDPNI SELNKSSQYTGSLHNIWYLYNSDPVNAK 60
SC457-selz1      MRKVFILITLLFGYSSYLLLEARAETQNDPNI SELNKSSQYTGSWHNIWYLYNSDPVNAK 60
SC635-selz3      MRKVFILITLLFGYSSYLLLEARAETQNDPNI SELNKSSQYTGSWHNIWYLYNSDPVNAK 60
*****:*****. * * *:***** *****:***** *****:*****

JKD6159-selz7      KTKLSDKFLSHDFIVPINSPGHYDYVKTELKDSTMASFDFGKEVDIFGVNYFHQCYSNE 120
M-selz8           KIKLSDKFLSHDFIVPINNPSHYDYVKTELKDSTMASFDFGKEVDIFGVNYFDQCYSNE 120
SC532-selz6      KIKLSDKFLSHDFIVPINSPGHYDYVKTELKDSTMASFDFGKEVDIFGVNYFDQCYSNE 120
NCTC6131-selz9   KIKLSDKFLSHDFIVPINSPGHYDYVKTELKDSTMASFDFGKEVDIFGVNYFDQCYSNE 120
WA-MRSA-59-selz4 KIKVSDKFLSHDFIVPINNPGHYDYVKTELKDSTMASFDFGKEVDIFGVNYFDQCYSNE 120
MOK042-selz2     KIKLSDKFLSHDFIVPINNPGHYDYVKTELKDSTMASFDFGKEVDIFGVNYFDQCYSNE 120
15584-selz5      KIKLSDKFLSHDFIVPINNPGHYDYVKTELKDSTMASFDFGKEVDIFGVNYFDQCYSNE 120
SC457-selz1      KIKLSDKFLSHDFIVPINNPGHYDYVKTELKDSTMASFDFGKEVDIFGVNYFDQCYSNE 120
SC635-selz3      KIKLSDKFLSHDFIVPINNPGHYDYVKTELKDSTMASFDFGKEVDIFGVNYFDQCYSNE 120
* *:*****:*****. * *:*****:*****:*****:*****:*****:*****

JKD6159-selz7      NIQCDSNQGAGSKKTCMYGGITLNNNTNRIQPIVVKVYENDSVTLSFDINIDKETVTI 180
M-selz8           NIQCDSNQGAGSKKTCMYGGITLNNNTNRIQPIVVKVYENDSVTLSFDINIDKETVTI 180
SC532-selz6      NIQCDSNQGAGSKKTCMYGGITLNNNTNRIQPIVVKVYENDSVTLSFDINIDKETVTI 180
NCTC6131-selz9   NIQCDSNQGAGSKKTCMYGGITLNNNTNRIQPIVVKVYENDSVTLSFDINIDKETVTI 180
WA-MRSA-59-selz4 NIQCDSNQGAGSKKTCMYGGITLNNNTNRIQPIVVKVYENDSVTLSFDINIDKETVTI 180
MOK042-selz2     NIQCDSNQGAGSKKTCMYGGITLNNNTNRIQPIVVKVYENDSVTLSFDINIDKETVTI 180
15584-selz5      NIQCDSNQGAGSKKTCMYGGITLNNNTNRIQPIVVKVYENDSVTLSFDINIDKETVTI 180
SC457-selz1      NIQCDSNQGAGSKKTCMYGGITLNNNTNRIQPIVVKVYENDSVTLSFDINIDKETVTI 180
SC635-selz3      NIQCDSNQGAGSKKTCMYGGITLNNNTNRIQPIVVKVYENDSVTLSFDINIDKETVTI 180
*****. *****:*****:*****:*****:*****:*****:*****

JKD6159-selz7      QELDYKVRNKLISKINLYHLGGTSYETGYIKFIENANRYWYDMMPPDPGFTQSKYLM IYR 240
M-selz8           QELDYKVRNKLISKINLYHLGGTSYETGYIKFIENGNRYWYDMMPPDPGFTQSKYLM IYR 240
SC532-selz6      QELDYKVRNKLISKINLYHLGGTSYETGYIKFIENGNRYWYDMMPPDPGFTQSKYLM IYR 240
NCTC6131-selz9   QELDYKVRNKLISKINLYHLGGTSYETGYIKFIENGNRYWYDMMPPDPGFTQSKYLM IYR 240
WA-MRSA-59-selz4 QELDYKVRNKLISKINLYHLGGTSYETGYIKFIENGNRYWYDMMPPDPGFTQSKYLM IYR 240
MOK042-selz2     QELDYKVRNKLISKINLYHLGGTSYETGYIKFIENGNRYWYDMMPPDPGFTQSKYLM IYR 240
15584-selz5      QELDYKVRNKLISKINLYHLGGTSYETGYIKFIENGNRYWYDMMPPDPGFTQSKYLM IYR 240
SC457-selz1      QELDYKVRNKLISKINLYHLGGTSYETGYIKFIENGNRYWYDMMPPDPGFTQSKYLM IYR 240
SC635-selz3      QELDYKVRNKLISKINLYHLGGTSYETGYIKFIENGNRYWYDMMPPDPGFTQSKYLM IYR 240
*****:*****:*****:*****:*****:*****:*****

JKD6159-selz7      GNETVESAKTEIEVHLTKK      259
M-selz8           GNETVESAKTEIEVHLTKK      259
SC532-selz6      GNETVESAKTEIEVHLTKK      259
NCTC6131-selz9   GNETVESAKTEIEVHLTKK      259
WA-MRSA-59-selz4 GNETVESAKTEIEVHLTKK      259
MOK042-selz2     GNETVESAKTEIEVHLTKK      259
15584-selz5      GNETVESAKTEIEVHLTKK      259
SC457-selz1      GNETVESAKTEIEVHLTKK      259
SC635-selz3      GNETVESAKTEIEVHLTKK      259
*****:*****:*****:*****:*****:*****:*****

```

**Figure S4.** Alignment of SEIZ amino acid sequences representing subtypes SEIZ1-SEIZ9. Asterisk indicates identical amino acid.



**Table S4.** Nucleotide Sequence identities (percentage) of *selz* gene among selected *S. aureus* isolates and those of reported *S. argenteus* strain.

| Strain                 | species            | genotype               | <i>selz</i> subtype | Identity with strain |       |             |      |
|------------------------|--------------------|------------------------|---------------------|----------------------|-------|-------------|------|
|                        |                    |                        |                     | SC635                | SC561 | Tokyo 12480 | SG01 |
| SC485                  | <i>S.aureus</i>    | <i>coaIIa</i> -ST764   | <i>selz</i> 1       | 99.5                 | 98.5  | 96.5        | 99.6 |
| SC635                  | <i>S.aureus</i>    | <i>coaVIIa</i> -ST12   | <i>selz</i> 3       |                      | 98.7  | 96.8        | 99.6 |
| SC561                  | <i>S.aureus</i>    | <i>coaIa</i> -ST89     | <i>selz</i> 6       |                      |       | 96.5        | 98.3 |
| Tokyo 12480 (AP019712) | <i>S.aureus</i>    |                        | <i>selz</i> 7       |                      |       |             | 96.2 |
| SG01 (MN166481)        | <i>S.argenteus</i> | <i>coaXI</i> d, ST2250 |                     |                      |       |             |      |

**Table S5.** Primers used in the present study.

| Target gene     | Primer                   | Nucleotide sequence              | Product size                      | Aim        | Reference           |
|-----------------|--------------------------|----------------------------------|-----------------------------------|------------|---------------------|
| <i>selx</i>     | <i>selx</i> -1           | (+) AGCAGACGCGTCAACACAAA         | 513 bp (+ <i>selx</i> -2)         | Detection  | Wilson et al., 2011 |
|                 | <i>selx</i> -2           | (-) ACTTGTCAATGTCATTAACACTTTTCAC |                                   | Detection  |                     |
|                 | <i>selx</i> -F1          | (+) GTCCAATTATGTGTAGACGA         | ca. 900 bp (+ <i>selx</i> -R1)    | Sequencing | Aung et al., 2019   |
|                 | <i>selx</i> -R1          | (-) GAATTTTCTATATGATGGTGCT       |                                   | Sequencing |                     |
| <i>sey</i>      | <i>sey</i> -F            | (+) CAATGTACGGACAGTGTCTACAA      | 189 bp (+ <i>sey</i> -R)          | Detection  | Ono et al., 2015    |
|                 | <i>sey</i> -R            | (-) TGACCGTTAACAAACAAGTTCATTC    |                                   | Detection  |                     |
|                 | <i>sey</i> -1            | (+) GAAATATTGATATATAGATCATT      | 843 bp (+ <i>sey</i> -2)          | Sequencing | Aung et al., 2019   |
|                 | <i>sey</i> -2            | (-) CCTAAGAACTTAATKTCCTAAGC      |                                   | Sequencing |                     |
| <i>selw</i>     | <i>selw</i> -F2          | (+) GGAATTTTTACAAATTCAGCG        | 323bp (+ <i>selw</i> -R2)         | Detection  | Aung et al., 2019   |
|                 | <i>selw</i> -R2          | (-) CTACATTGCGTTTTATTGGTTG       |                                   | Detection  |                     |
|                 | <i>selw</i> -F3          | (+) TTGTTTTGGGGGAGTTTGAAG        | ca.800 bp (+ <i>selw</i> -R4/R3)  | Sequencing | Aung et al., 2019   |
|                 | <i>selw</i> -R4          | (-) ACTTTATATTTCACTGTCAAAG       |                                   | Sequencing |                     |
|                 | <i>selw</i> -R3          | (-) GTCAAAGATTATTAATGATTAAC      |                                   | Sequencing |                     |
| <i>selz</i>     | <i>selz</i> -F1          | (+) GGTTACAGTAGCTATICTTTTGTG     | ca.500 bp (+ <i>selz</i> -R1)     | Detection  | Aung et al., 2019   |
|                 | <i>selz</i> -R1          | (-) GTAAACTTTTACAACAATAGGCTG     |                                   | Detection  |                     |
|                 | <i>selz</i> -F2          | (+) GTTATAAAATAGCAATGGTTG        | ca.1 kb (+ <i>selz</i> -R2)       | Sequencing | Aung et al., 2019   |
|                 | <i>selz</i> -R2          | (-) GAGCAACTTTTCCAAGTCGC         |                                   | Sequencing |                     |
|                 | <i>selz</i> -R3          | (-) CATTGAAAAATAGCATTGATC        |                                   | Sequencing |                     |
| <i>selz</i> -R4 | (-) GATAAGTTGCTCTATGTCTA | ca.800 bp (+ <i>selz</i> -F2)    | Sequencing                        |            |                     |
| <i>sel26</i>    | <i>sel26</i> -F1         | (+) CTTATGCTGATGTAGGTGTTT        | ca. 300 bp (+ <i>sel27</i> -R1)   | Detection  | Aung et al., 2019   |
|                 | <i>sel26</i> -R1         | (-) CATTATCCAAAAGATTTATCGG       |                                   | Detection  |                     |
|                 | <i>sel26</i> -5p-F1      | (+) GAAGAAAAACACGATAACGGTG       | ca.1.4 kb (+ <i>sel28</i> -3p-R1) | Sequencing |                     |
| <i>sel27</i>    | <i>sel27</i> -F1         | (+) TGAAGGCGCTCTATGAATCAG        | ca. 500bp (+ <i>sel28</i> -R1)    | Detection  | Aung et al., 2019   |
|                 | <i>sel27</i> -R1         | (-) TACTCTGCGTAAAAATTTGGG        |                                   | Detection  |                     |
|                 | <i>sel27</i> -3p-R1      | (-) ACAGGCTATCGTAAATCGCT         |                                   | Sequencing |                     |

**Table 6.** GenBank accession numbers assigned to *selx*, *sey*, *selw* and *selz* detected in the present study.

| <i>selx</i> |                                |              | <i>sey</i>  |                      |              | <i>selw</i> |                                |              | <i>selz</i> |                      |              |
|-------------|--------------------------------|--------------|-------------|----------------------|--------------|-------------|--------------------------------|--------------|-------------|----------------------|--------------|
| Specimen ID | genotype                       | Accession No | Specimen ID | genotype             | Accession No | Specimen ID | genotype                       | Accession No | Specimen ID | genotype             | Accession No |
| SC460       | <i>coa</i> Ia-ST89             | MN257075     | SC612       | <i>coa</i> Ia-ST89   | MN257099     | SC735       | <i>coa</i> Ia-ST89             | MN257123     | SC532       | <i>coa</i> Ia-ST89   | MN257147     |
| SC654       | <i>coa</i> Ia-ST89             | MN257076     | SC575       | <i>coa</i> Ia-ST89   | MN257100     | SC756       | <i>coa</i> Ia-ST89             | MN257124     | SC561       | <i>coa</i> Ia-ST89   | MN257148     |
| SC735       | <i>coa</i> Ia-ST89             | MN257077     | SC588       | <i>coa</i> Ia-ST89   | MN257101     | SC778       | <i>coa</i> Ia-ST89             | MN257125     | SC1103      | <i>coa</i> Ia-ST89   | MN257149     |
| SC698       | <i>coa</i> IIa-ST5             | MN257078     | SC823       | <i>coa</i> IIa-ST5   | MN257102     | SC465       | <i>coa</i> IIa-ST764           | MN257126     | SC485       | <i>coa</i> IIa-ST764 | MN257150     |
| SC714       | <i>coa</i> IIa-ST764           | MN257079     | SC610       | <i>coa</i> IIa-ST764 | MN257103     | SC792       | <i>coa</i> IIa-ST5             | MN257127     | SC585       | <i>coa</i> IIa-ST5   | MN257151     |
| SC1100      | <i>coa</i> IIa-ST5             | MN257080     | SC1097      | <i>coa</i> IIa-ST5   | MN257104     | SC936       | <i>coa</i> IIa-ST5             | MN257128     | SC1097      | <i>coa</i> IIa-ST5   | MN257152     |
| SC825       | <i>coa</i> IIa-ST764           | MN257081     | SC630       | <i>coa</i> IIa-ST5   | MN257105     | SC955       | <i>coa</i> IIa-ST5             | MN257129     | SC457       | <i>coa</i> Va-ST121  | MN257153     |
| SC709       | <i>coa</i> IIa-ST764           | MN257082     | SC1100      | <i>coa</i> IIa-ST764 | MN257106     | SC526       | <i>coa</i> IIIa-ST8            | MN257130     | SC732       | <i>coa</i> Va-ST121  | MN257154     |
| SC822       | <i>coa</i> IIa-ST5             | MN257083     | SC582       | <i>coa</i> IIIa-ST8  | MN257107     | SC546       | <i>coa</i> IIIa-ST8            | MN257131     | SC703       | <i>coa</i> Va-ST121  | MN257155     |
| SC978       | <i>coa</i> IIIa-ST8            | MN257084     | SC569       | <i>coa</i> IIIa-ST8  | MN257108     | SC625       | <i>coa</i> IIIa-ST8            | MN257132     | SC595       | <i>coa</i> Va-ST121  | MN257156     |
| SC699       | <i>coa</i> IIIa-ST8            | MN257085     | SC625       | <i>coa</i> IIIa-ST8  | MN257109     | SC1019      | <i>coa</i> IIIa-ST8            | MN257133     | SC584       | <i>coa</i> Va-ST121  | MN257157     |
| SC706       | <i>coa</i> IIIa-ST8            | MN257086     | SC628       | <i>coa</i> IIIa-ST8  | MN257110     | SC1130      | <i>coa</i> IIIa-ST8            | MN257134     | SC568       | <i>coa</i> Va-ST121  | MN257158     |
| SC526       | <i>coa</i> IIIa-ST8            | MN257087     | SC633       | <i>coa</i> IIIa-ST8  | MN257111     | SC519       | <i>coa</i> IVa-ST30            | MN257135     | SC462       | <i>coa</i> Va-ST121  | MN257159     |
| SC1019      | <i>coa</i> IIIa-ST8            | MN257088     | SC910       | <i>coa</i> Va-ST121  | MN257112     | SC761       | <i>coa</i> Va-ST121            | MN257136     | SC635       | <i>coa</i> VIIa-ST12 | MN257160     |
| SC1060      | <i>coa</i> IIIa-ST8            | MN257089     | SC736       | <i>coa</i> Va-ST121  | MN257113     | SC732       | <i>coa</i> Va-ST121            | MN257137     |             |                      |              |
| SC1137      | <i>coa</i> Va-ST121            | MN257090     | SC1133      | <i>coa</i> Va-ST121  | MN257114     | SC1133      | <i>coa</i> Va-ST121            | MN257138     |             |                      |              |
| SC798       | <i>coa</i> Va-ST121            | MN257091     | SC798       | <i>coa</i> Va-ST121  | MN257115     | SC1137      | <i>coa</i> Va-ST121            | MN257139     |             |                      |              |
| SC910       | <i>coa</i> Va-ST121            | MN257092     | SC578       | <i>coa</i> Va-ST121  | MN257116     | SC1096      | <i>coa</i> Vb-ST5425 (ST5 SLV) | MN257140     |             |                      |              |
| SC1096      | <i>coa</i> Vb-ST5425 (ST5 SLV) | MN257093     | SC635       | <i>coa</i> VIIa-ST12 | MN257117     | SC458       | <i>coa</i> VIIa-ST1            | MN257141     |             |                      |              |
| SC958       | <i>coa</i> VIIa-ST1            | MN257094     | SC598       | <i>coa</i> VIIa-ST1  | MN257118     | SC470       | <i>coa</i> VIIa-ST1            | MN257142     |             |                      |              |
| SC1065      | <i>coa</i> VIIa-ST1            | MN257095     | SC634       | <i>coa</i> VIIa-ST1  | MN257119     | SC560       | <i>coa</i> VIIa-ST1            | MN257143     |             |                      |              |
| SC1071      | <i>coa</i> VIIa-ST1            | MN257096     | SC626       | <i>coa</i> VIIa-ST1  | MN257120     | SC635       | <i>coa</i> VIIa-ST12           | MN257144     |             |                      |              |
| SC650       | <i>coa</i> VIIa-ST1            | MN257097     | SC614       | <i>coa</i> VIIa-ST1  | MN257121     | SC533       | <i>coa</i> VIIb-ST45           | MN257145     |             |                      |              |
| SC533       | <i>coa</i> VIIb-ST45           | MN257098     | SC533       | <i>coa</i> VIIb-ST45 | MN257122     | SC912       | <i>coa</i> VIIb-ST45           | MN257146     |             |                      |              |
